# Supplementary material for: Bioaccessibility of Carotenoids and Polyphenols in Organic Butternut Squash (Cucurbita moschata): Impact of Industrial Freezing Process
Source: MDPI journal article supplement (doi:10.3390/foods13020239), 2024-01-11
Supplement: s1 [file s1]

**Table S1.** Standards used for the quantification of polyphenols with HPLC-PDA.

| Compound                                | Slope | Intercept | R <sup>2</sup> | LOD<br>(mg/L) | LOQ<br>(mg/L) |
|-----------------------------------------|-------|-----------|----------------|---------------|---------------|
| Flavonoids                              |       |           |                |               |               |
| Epigallocatechin                        | 2545  | -6387     | 0.9974         | 0.6           | 1.9           |
| Epicatechin                             | 6823  | -3226     | 0.9999         | 0.5           | 1.7           |
| Luteolin 7-O-glucoside (Cynaroside)     | 13330 | -10919    | 0.9999         | 0.6           | 2.0           |
| Quercetin 3-O-galactoside (Hyperoside)  | 15604 | -39281    | 0.9981         | 2.7           | 9.1           |
| Quercetin 3-O-glucuronide (Quercituron) | 22443 | -50988    | 0.9984         | 0.8           | 2.6           |
| Naringin                                | 15463 | -2019     | 0.9994         | 0.8           | 2.7           |
| Phenolic acids                          |       |           |                |               |               |
| Gallic acid                             | 26694 | 12696     | 0.9996         | 0.4           | 1.4           |
| Chlorogenic acid                        | 23847 | -18436    | 0.9999         | 0.8           | 2.8           |
| Syringic acid                           | 30921 | -24654    | 0.9999         | 0.4           | 1.2           |
| Ferulic acid                            | 49055 | -33126    | 0.9999         | 0.7           | 2.2           |

LOD: limit of detection, LOQ: limit of quantification.
